# Supplementary material for: Polymer interface engineering enabling high-performance perovskite solar cells with improved fill factors of over 82%
Source: Royal Society of Chemistry journal article supplement (doi:10.1039/c9tc06578d), 2020-01-01
Supplement: c9tc06578d1.pdf [file c9tc06578d1.pdf]

**Polymer interface engineering enabling high-performance perovskite solar cells  
with improved fill factor over 82%**

Quanzeng Zhang<sup>a</sup>, Shaobing Xiong<sup>b</sup>, Jazib Ali<sup>a</sup>, Kun Qian<sup>a</sup>, Yu Li<sup>a, c</sup>, Wei Feng<sup>d</sup>, Hailin Hu<sup>e</sup>, Jingnan Song<sup>\*a</sup> and Feng Liu<sup>\*a, c</sup>

<sup>a</sup>School of Physics and Astronomy, and Collaborative Innovation Center of IFSA (CICIFSA), Shanghai Jiao Tong University, 200240, Shanghai, China

<sup>b</sup>Key Laboratory of Polar Materials and Devices, Ministry of Education, East China Normal University, 200241 Shanghai, PR China

<sup>c</sup>School of Chemistry and Chemical Engineering, and Center for Advanced Electronic Materials and Devices, Shanghai Jiao Tong University, 200240, Shanghai, China

<sup>d</sup>State Key Laboratory of Fluorinated Materials, Zibo City, Shandong 256401, China.

<sup>e</sup>Instituto de Energías Renovables, Universidad Nacional Autónoma de México, Priv. Xochicalco S/N, 62580 Temixco, Morelos, Mexico

\*Address correspondence to: [sjn199319@sjtu.edu.cn](mailto:sjn199319@sjtu.edu.cn), [fengliu82@sjtu.edu.cn](mailto:fengliu82@sjtu.edu.cn)

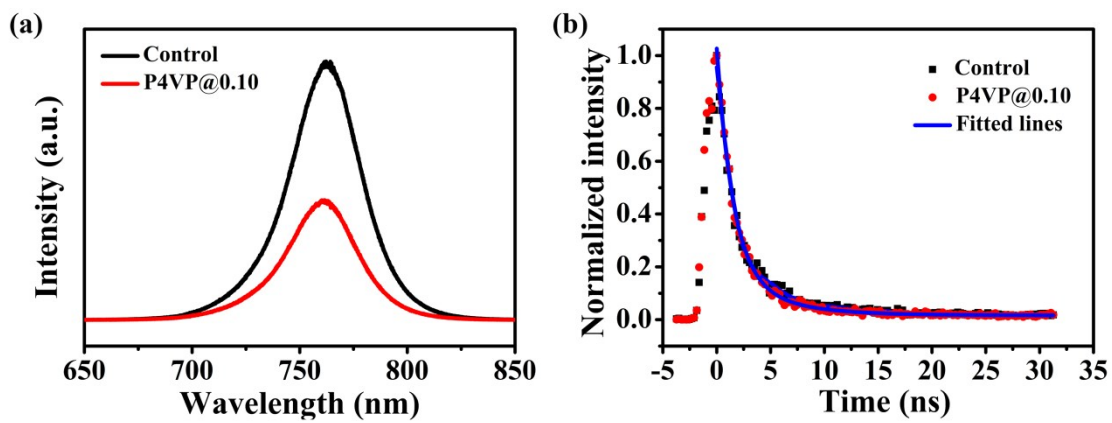

**Fig. S1** (a) Photoluminescence (PL) spectra and (b) time-resolved photoluminescence (TRPL) spectra of perovskite films with PCBM capping layer.

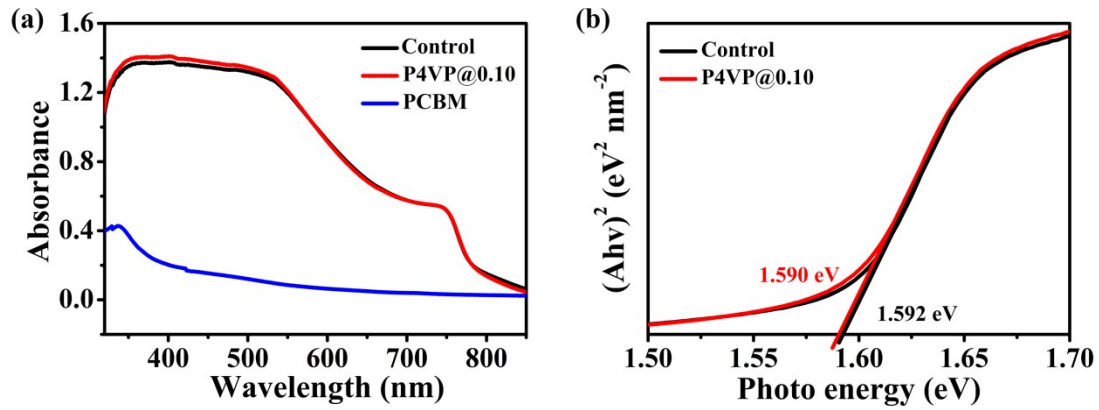

**Fig. S2** (a) UV-vis absorption spectra and (b) Tauc plots of the control perovskite film, P4VP modified perovskite film, and electron-transporting layer (PCBM) (Inset in Fig. S2b).

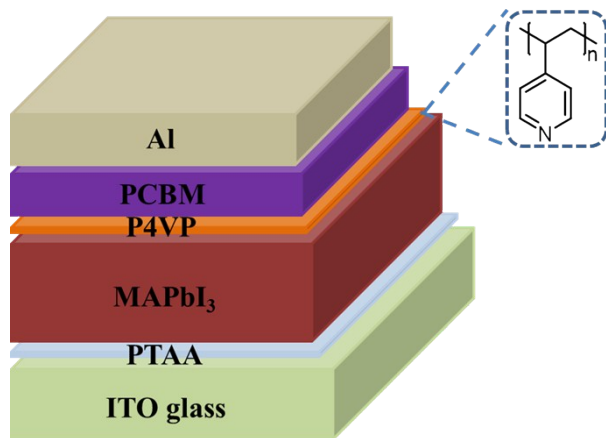

**Fig. S3** Device structure of MAPbI<sub>3</sub> based perovskite solar cells.

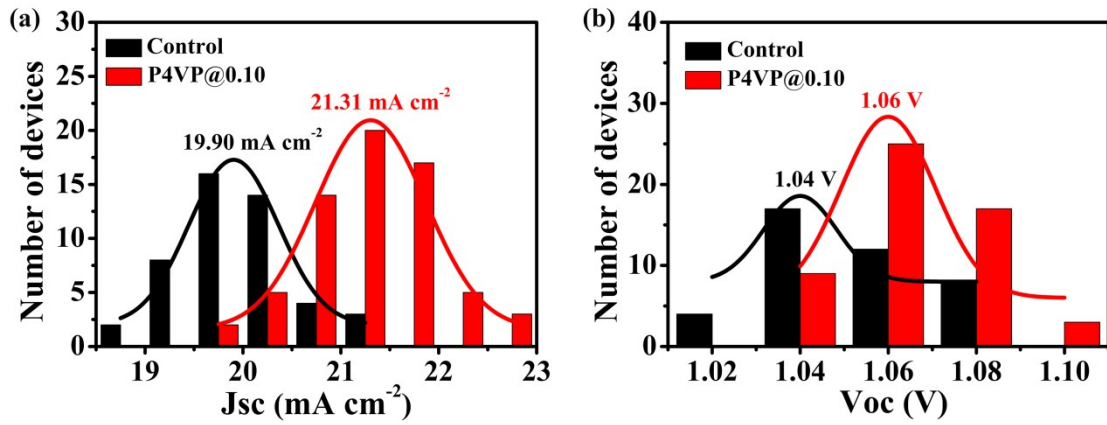

**Fig. S4** Histogram of short current density ( $J_{sc}$ ) and open-circuit voltage ( $V_{oc}$ ) for the control and P4VP modified samples. All the black/red lines were obtained by fitting the histograms using Gaussian function.

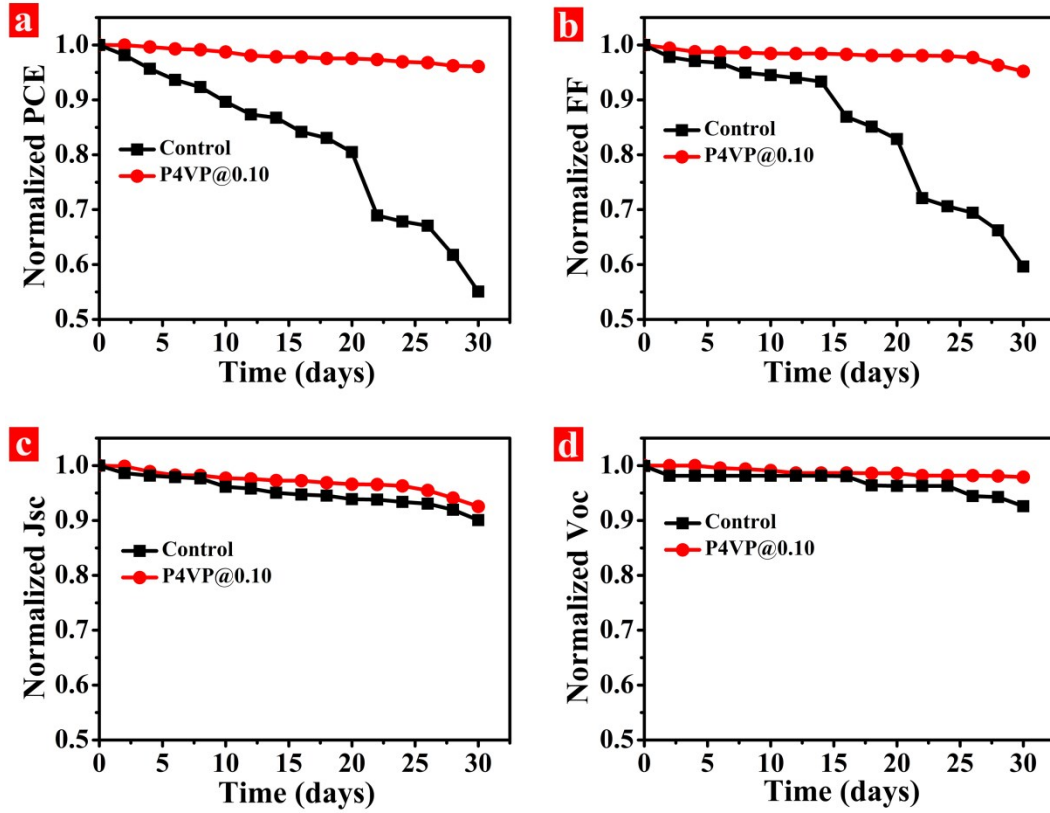

**Fig. S5** Stability evaluation of the control and optimal devices, which were stored in nitrogen atmosphere for 30 days.

**Table S1** Fitting parameters for time-resolved photoluminescence (TRPL) spectra obtained by illuminating glass/MAPbI<sub>3</sub> and glass/MAPbI<sub>3</sub>/P4VP@0.10.

|           | $\tau_1$ (ns) | Frac. $\tau_1$ (%) | $\tau_2$ (ns) | Frac. $\tau_2$ (%) | Lifetime (ns) |
|-----------|---------------|--------------------|---------------|--------------------|---------------|
| Control   | 4.40          | 58.50              | 25.47         | 41.50              | 13.14         |
| P4VP@0.10 | 4.74          | 52.38              | 42.41         | 47.62              | 22.67         |

**Table S2** Fitting parameters for TRPL spectra obtained by illuminating glass/MAPbI<sub>3</sub>/PCBM and glass/MAPbI<sub>3</sub>/P4VP@0.10/PCBM.

|           | $\tau_1$ (ns) | Frac. $\tau_1$ (%) | $\tau_2$ (ns) | Frac. $\tau_2$ (%) | Lifetime (ns) |
|-----------|---------------|--------------------|---------------|--------------------|---------------|
| Control   | 1.35          | 72.35              | 5.28          | 27.65              | 2.44          |
| P4VP@0.10 | 1.51          | 80.92              | 4.95          | 19.08              | 2.17          |
